# Supplementary material for: Risk factors for severe illness and death in COVID-19: a systematic review and meta-analysis
Source: medRxiv preprint, doi:10.1101/2020.12.03.20243659, version 1 (2020-12-04)
Supplement: Supplemental Fig 4 [file 243659_file13.docx]

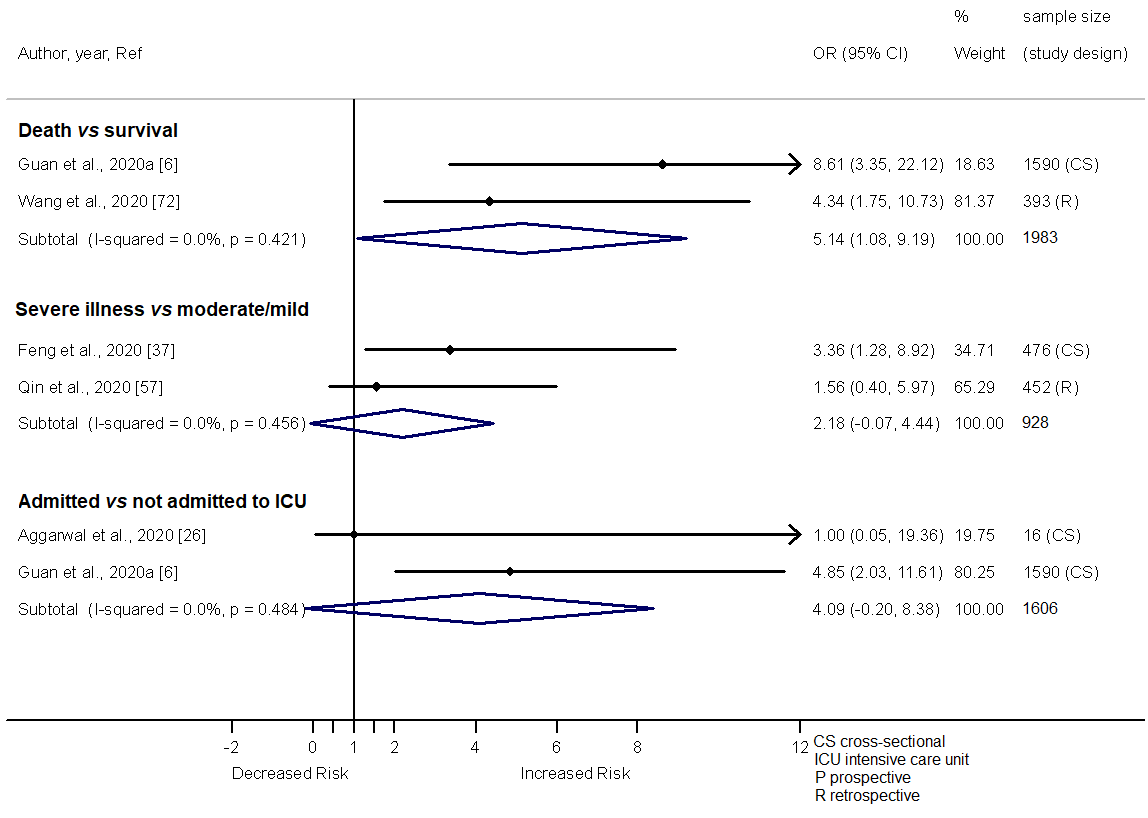


Additional file 7. Forest plot showing the relationship of Cerebrovascular disease with the odds of death, severe illness and admission in ICU among COVID-19 patients.
